# Supplementary material
Source: PubMed Central journal article supplement (PMC3400804)
Supplement: supp_112.193425_JPET193425_SupplFigure1.pdf [file supp_112.193425_JPET193425_SupplFigure1.pdf]

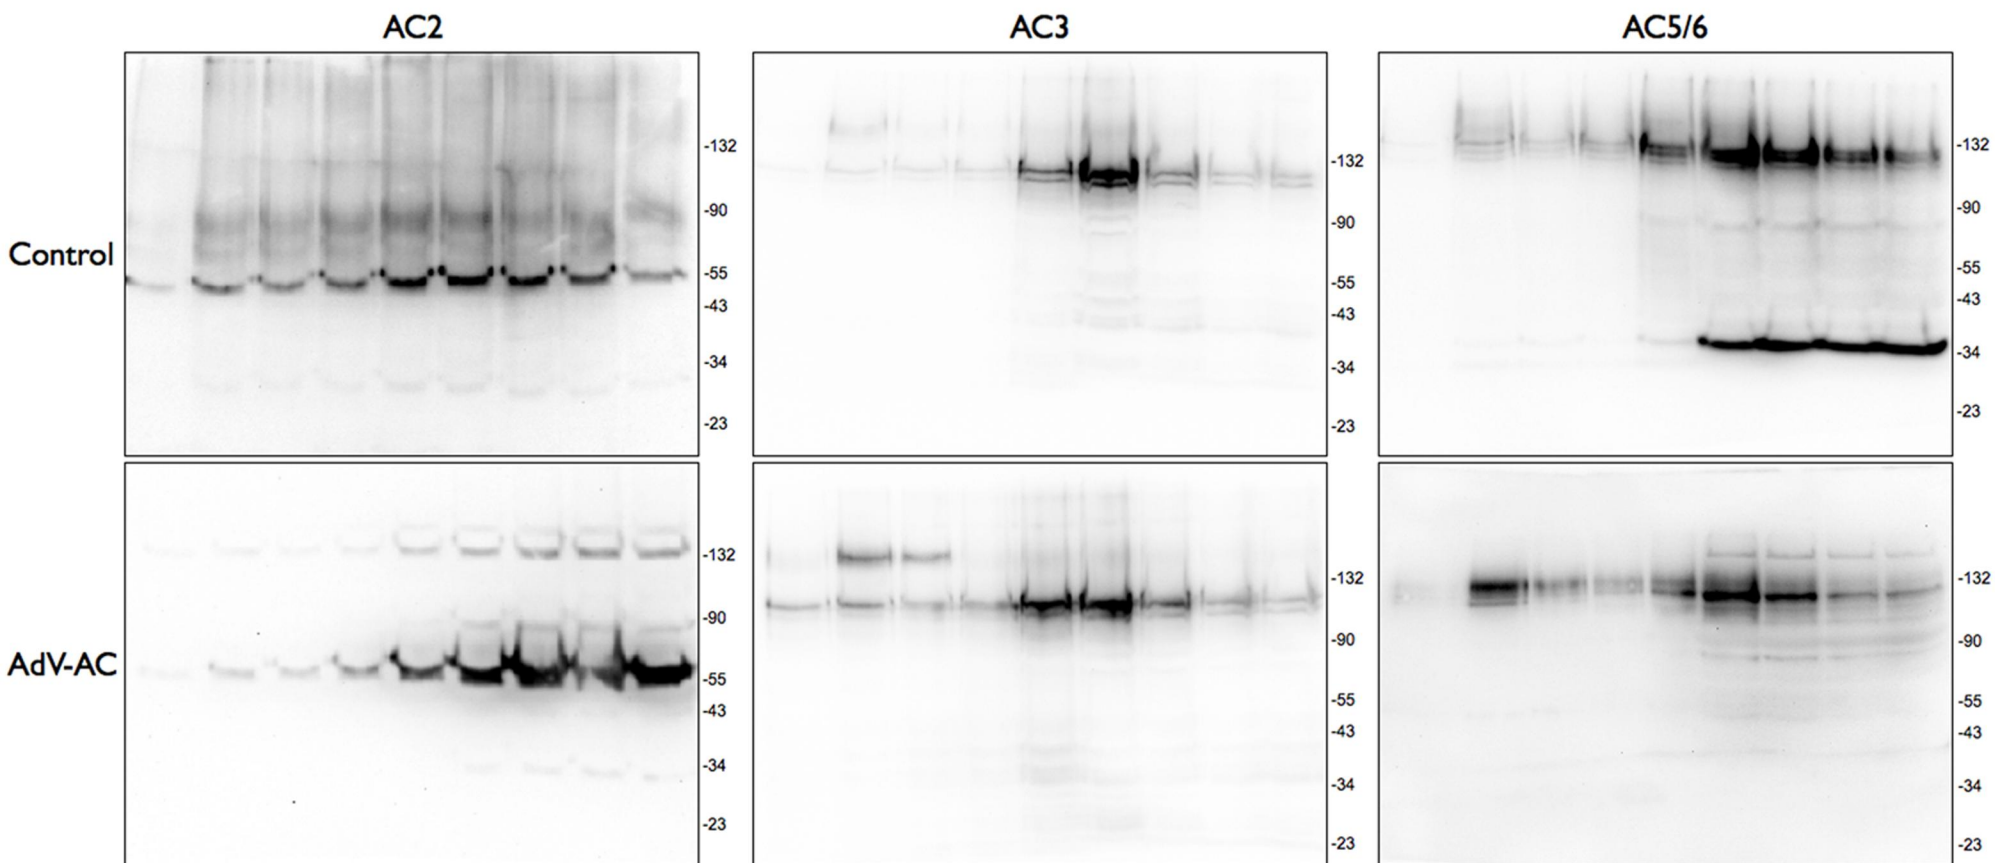

Supplemental Figure 1:

Immunoblot analyses of fractions from lipid raft isolation from mBSMC. Cells were fractionated using a non-detergent method and separated by sucrose density centrifugation (see Materials and Methods). Gradients were collected in ten, 0.5 mL fractions and analyzed for appropriate separation of marker proteins (not shown). Fractions were separated by SDS-PAGE and analyzed by immunoblotting using the indicated primary antibody. Shown are full length immunoblot images using antibodies for AC2, AC3 and AC5/6 in either control mBSMC (top) or cells incubated with adenovirus to overexpress the respective AC isoform being detected (AC2, AC3 or AC6). Images shown are from separate experiments than the cropped versions displayed in the manuscript (Figure 2) and are representative of 3-5 experiments.
